# Supplementary material for: Ngn3-Positive Cells Arise from Pancreatic Duct Cells
Source: MDPI journal article supplement (doi:10.3390/ijms22168548), 2021-08-09
Supplement: s1 [file s1]

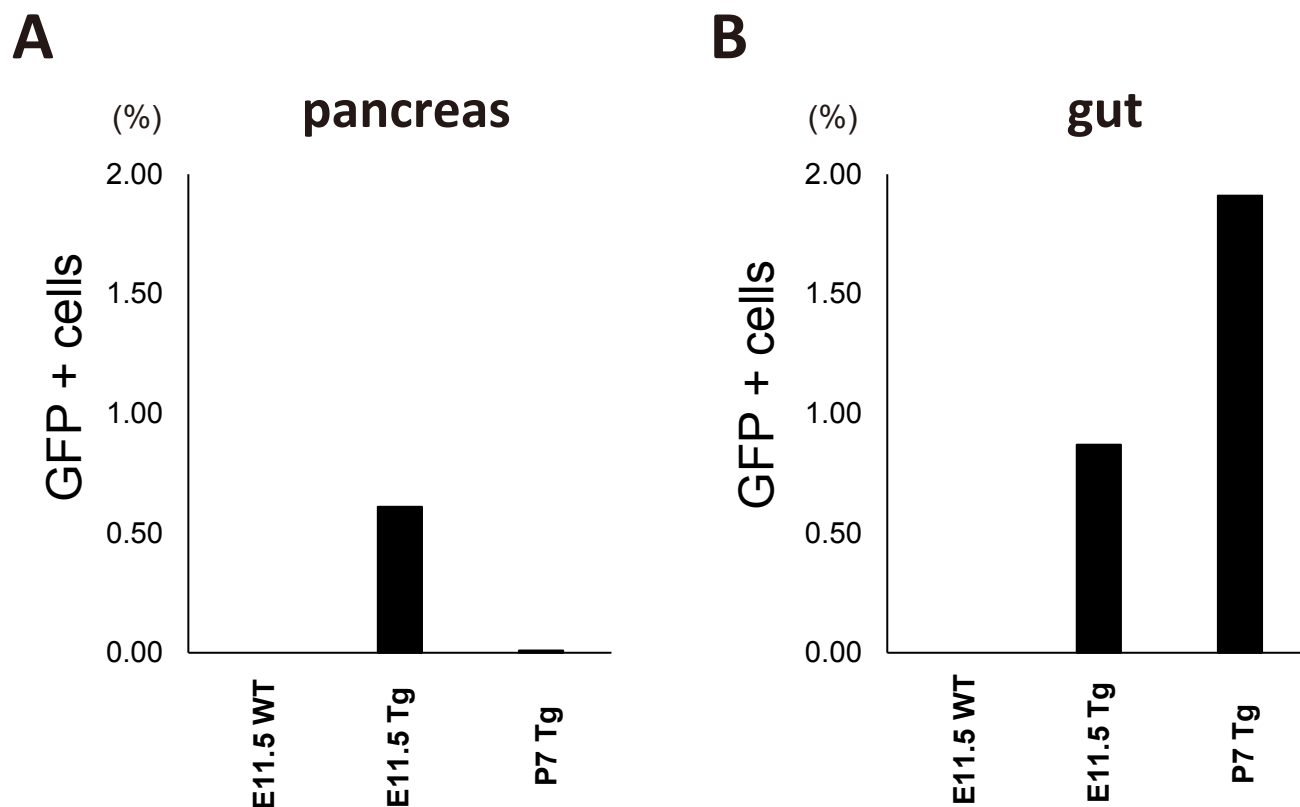

**Supplementary fig. 1**

Ngn3-positive cells appear transiently during pancreas development. Pancreas (A) and gut (B) cells dissected from Ngn3-GFP-transgenic (Tg) mouse and GFP-marked cells were counted by fluorescence activated cell sorting (FACS) system at embryonic day 11.5 (E11.5) and post-natal day 7 (P7) and the ratio of GFP-positive cells is shown by the percentage (%). GFP-positive cells from Ngn3-GFP-Tg mouse appear in the E11.5 pancreas but will almost disappear at P7. In contrast, GFP-positive cells continuously appear in the gut of P7 Ngn3-GFP-Tg mouse. E11.5 wild-type (Wt) mice were used as a negative control.

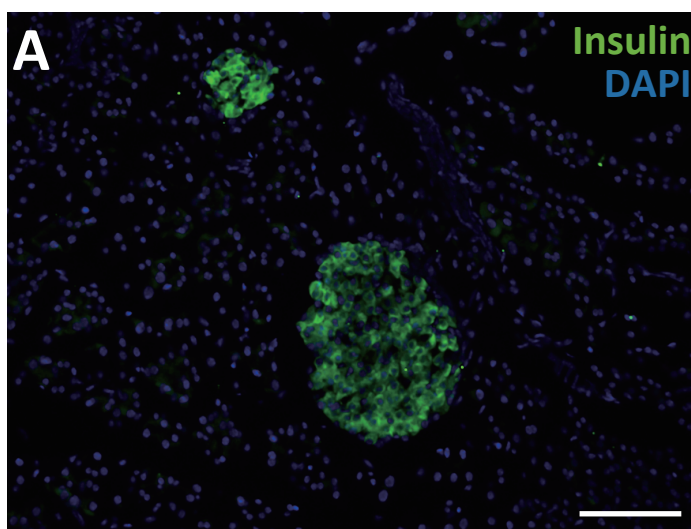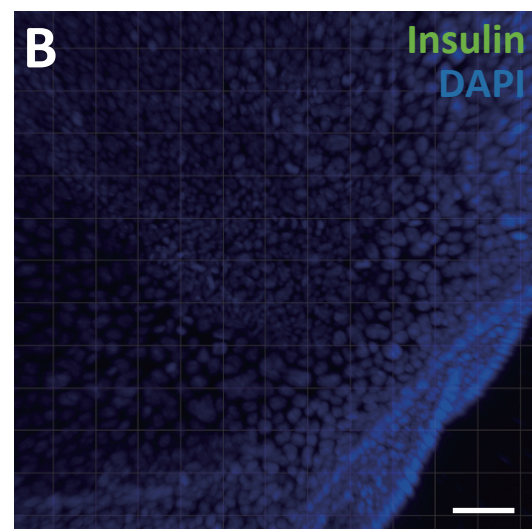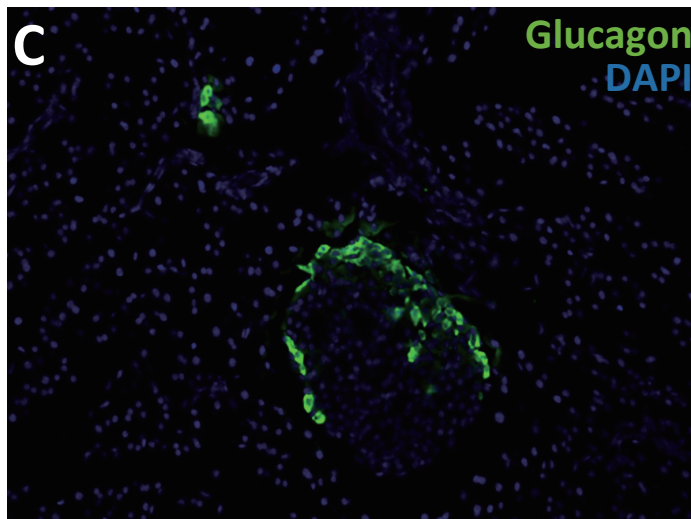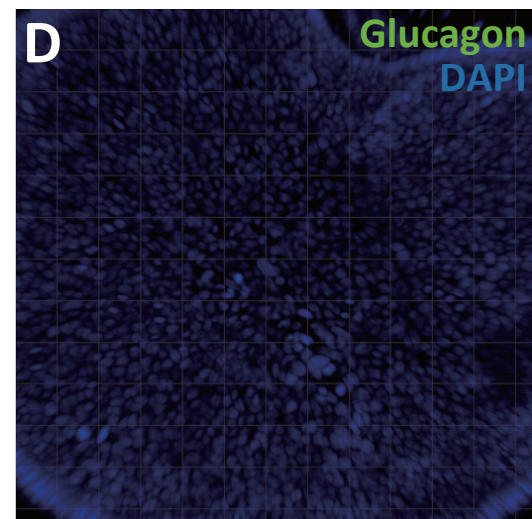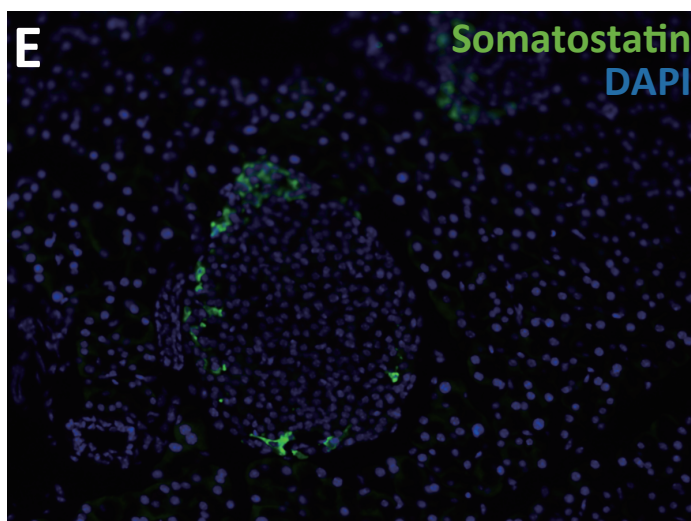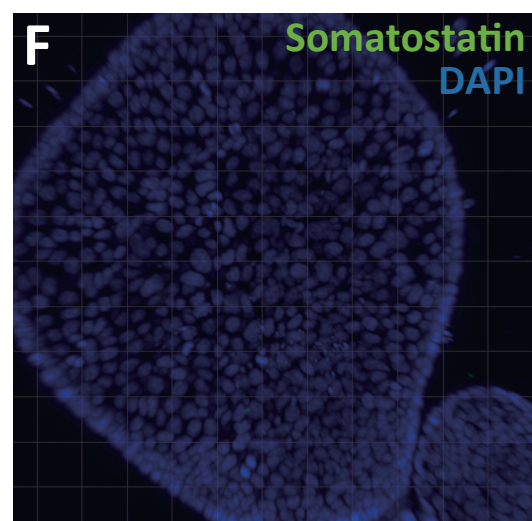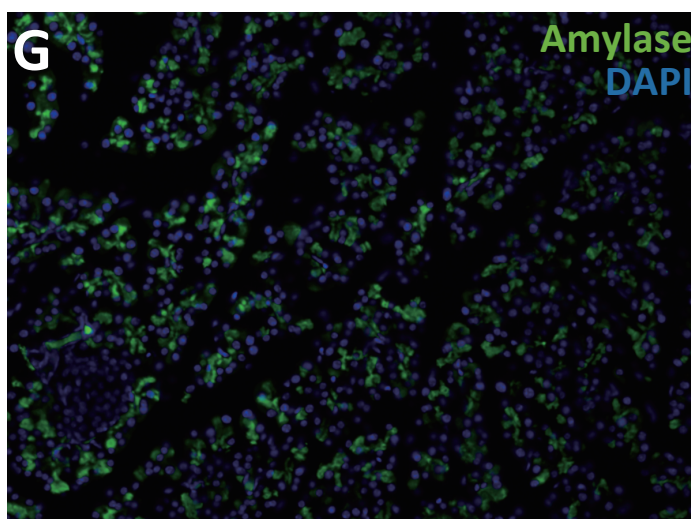

### Supplementary fig. 2

Immunohistochemical analysis comparing the expression of hormones between the pancreas and day 4 organoids prepared from pancreatic ducts.

Insulin, glucagon, and somatostatin were detected within islets using specific antibodies against each hormone (A, C, E). Amylase-specific antibodies marked most acinar cells in the pancreas (G), whereas amylase expression was absent from day 4 pancreatic organoids (Fig. 2G in the main manuscript). We did not detect hormone expression in day 4 pancreatic organoids (B, D, and F). (bars: 100  $\mu$ m).

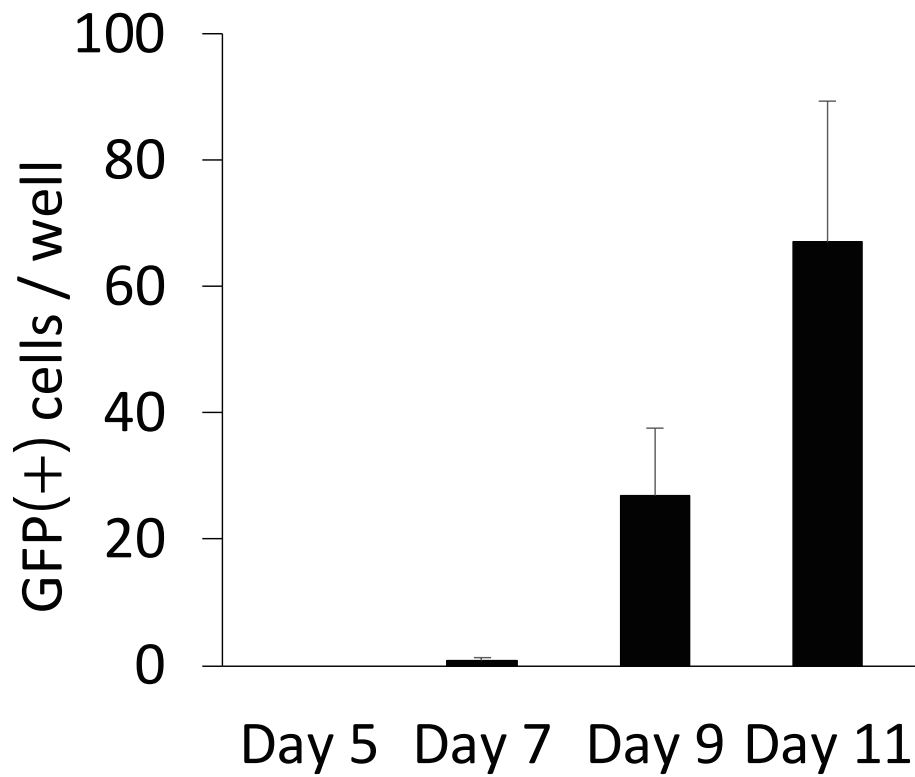

**Supplementary fig. 3**

Changes in the number of Ngn3-GFP-positive cells within pancreatic organoids generated from Ngn3-GFP mouse. GFP-positive cells per well were counted on days 5, 7, 9, and 11 of organoid culture (n = 9). GFP-positive cells were first identified on day 7, and the number of GFP-positive cells increased towards day 11.

**Table S1** Primer sequences in RT-PCR

| Gene name      | Forward (5'-3')             | Reverse (3'-5')             |
|----------------|-----------------------------|-----------------------------|
| <i>Ngn3</i>    | GAG TCG GGA GAA CTA GGA TG  | CAG TCA CCC ACT TCT GCT TC  |
| <i>NeuroD1</i> | GTC CCA GCC CAC TAC CAA TT  | CGG CAC CGG AAG AGA AGA TT  |
| <i>Isl1</i>    | CTG CTT TTC AGC AAC TGG TCA | AGG ACT GGC TAC CAT GCT GT  |
| <i>Gcg</i>     | CCA CTC ACA GGG CAC ATT CA  | GTC CCT GGT GGC AAG ATT AT  |
| <i>Sst</i>     | TCC GTC CAG TTT CTG CAG AAG | ACA GGA TGT GAA TGT CTT CC  |
| <i>Ghrl</i>    | GAC AAG CAG AAG AGA CAG AG  | TCT TCC CAG AGG ATA TCC TG  |
| <i>Chga</i>    | CTG TCA GCC CTG AGT GTC TG  | ATG GAA GTG GGA ACT GGA TG  |
| <i>Trpm5</i>   | AGT GTG ACA TGG TGG CCA TC  | AGA GAA CAG TTC ACA CGA GC  |
| <i>Gnat3</i>   | CCA GGA ATC CAA GCC TGC TT  | ACC ATG TCA TAG GCA CTT AGC |
| <i>Pou2f3</i>  | GCA TCG AGA CCA ACA TAC GC  | GAG ACG AAG GCC TGC TGT TG  |
| <i>G3PDH</i>   | ACC ACA GTC CAT GCC ATC AC  | TCC ACC ACC CTG TTG CTG TA  |
